# Supplementary material for: Enhanced inverted singlet–triplet gaps in azaphenalenes and non-alternant hydrocarbons
Source: Royal Society of Chemistry journal article supplement (doi:10.1039/d3cc05747j), 2024-01-01
Supplement: d3cc05747j1.pdf [file d3cc05747j1.pdf]

# Electronic Supplementary Information for: Enhanced inverted singlet-triplet gaps in azaphenalenenes and non-alternant hydrocarbons

Marc H. Garner<sup>‡,\*</sup>, J. Terence Blaskovits<sup>‡</sup>, and Clémence Corminboeuf\*

*Laboratory for Computational Molecular Design, Institute of Chemical Sciences and  
Engineering, Ecole Polytechnique federale de Lausanne (EPFL), 1015 Lausanne,  
Switzerland.*

<sup>‡</sup>*These authors contributed equally to this work.*

E-mail: marc.garner@epfl.ch; clemence.corminboeuf@epfl.ch

## Additional figures and tables

All molecules that have been examined at the EOM-CCSD level are listed in Table S1, along with computations at the second-order approximate coupled-cluster level (CC2) level carried out using Turbomole 7.1.<sup>1</sup> The CC2 method is computationally more feasible than EOM-CCSD and thus enables us to assess larger molecules with the aug-cc-pVDZ basis set. Compared to EOM-CCSD, singlet-triplet gaps are systematically underestimated (more negative) at the CC2/aug-cc-pVDZ level,<sup>2,3</sup> which we also see in the current dataset (Table S1). Both EOM-CCSD and CC2 computations reveal that there is little basis set dependence in the studied molecules upon increasing the basis set size from cc-pVDZ to aug-cc-pVDZ. Note that mol15 is cyclopenta[*ef*]heptalene, mol62 is benzo[*f*]cyclopenta[*cd*]azulene, and mol151 is azuleno[2,1,8-*kla*]heptalene. All optimized structures are available as supporting files in xyz-format.

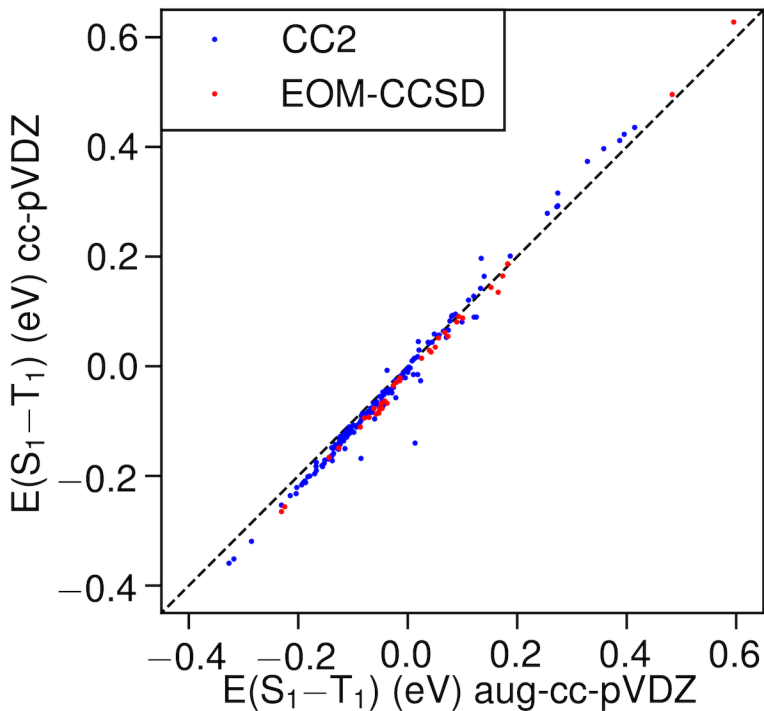

Figure S1: Singlet-triplet gaps computed with EOM-CCSD and CC2 methods using the aug-cc-pVDZ and cc-pVDZ basis sets. All values from Table S1 where both aug-cc-pVDZ and cc-pVDZ data are available are included in this plot.

We have examined the possible inversion of the singlet-triplet gap in azulene because it has a small  $E(S_1-T_1)$  (Figure S2). We find several substituted azulene derivatives that exhibit higher-lying Hund's rule violations. There is always another triplet that is lower than that corresponding to  $S_1$  because close-lying molecular orbitals switch order, which has also been reported in other contexts.<sup>4,5</sup> All substituted azulenes are included in Table S1.

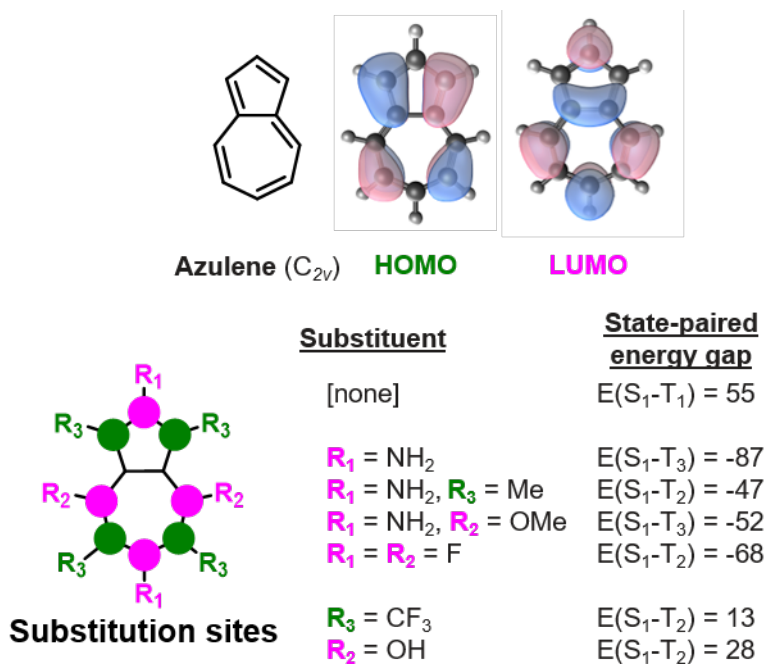

Figure S2: Structure and computed singlet-triplet gaps in substituted azulenes.  $R$  groups are H unless otherwise stated. Energies are provided in  $meV$ .

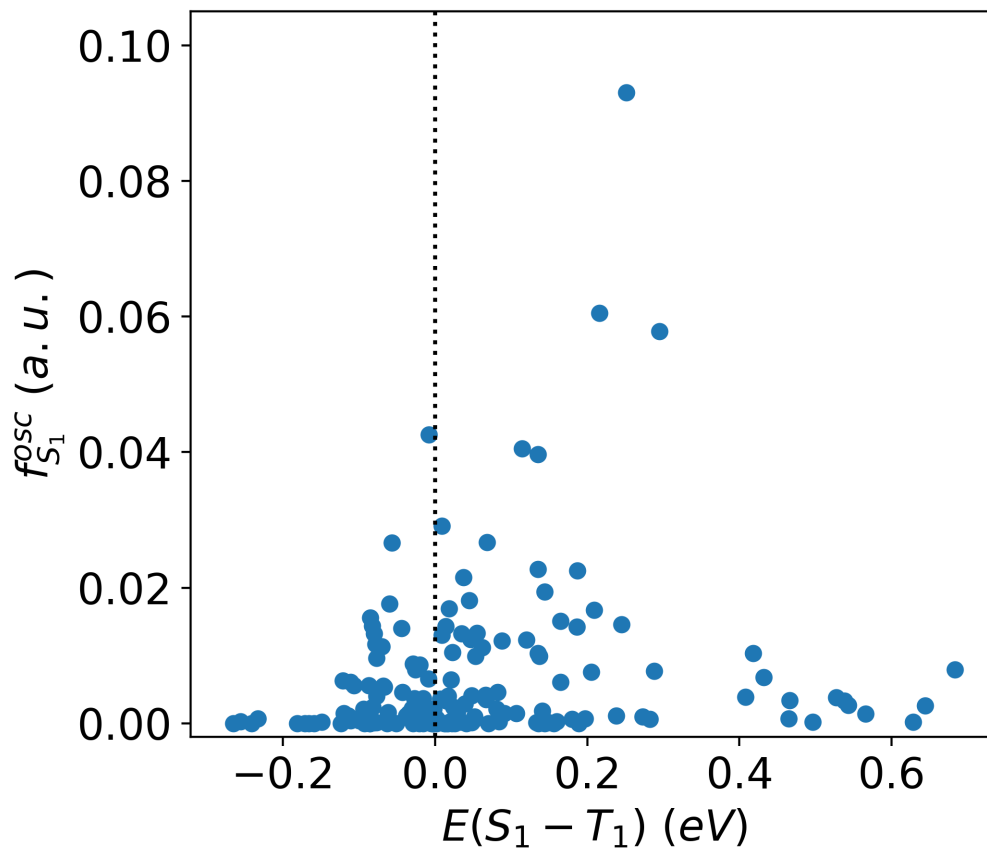

Figure S3: Comparison of the excited-state singlet-triplet gap ( $E(S_1 - T_1)$ , *x-axis*) and the oscillator strength of the lowest singlet excited state ( $f_{S_1}^{osc}$ , *y-axis*) for bare and substituted compounds studied in this work. Energies computed at the EOM-CCSD/cc-pVDZ level (see Table S1 for values). Oscillator strengths computed using Tamm-Dancoff-approximated time-dependent density functional theory at the  $\omega$ B97X-D/def2-TZVP level (see Table S2 for values).

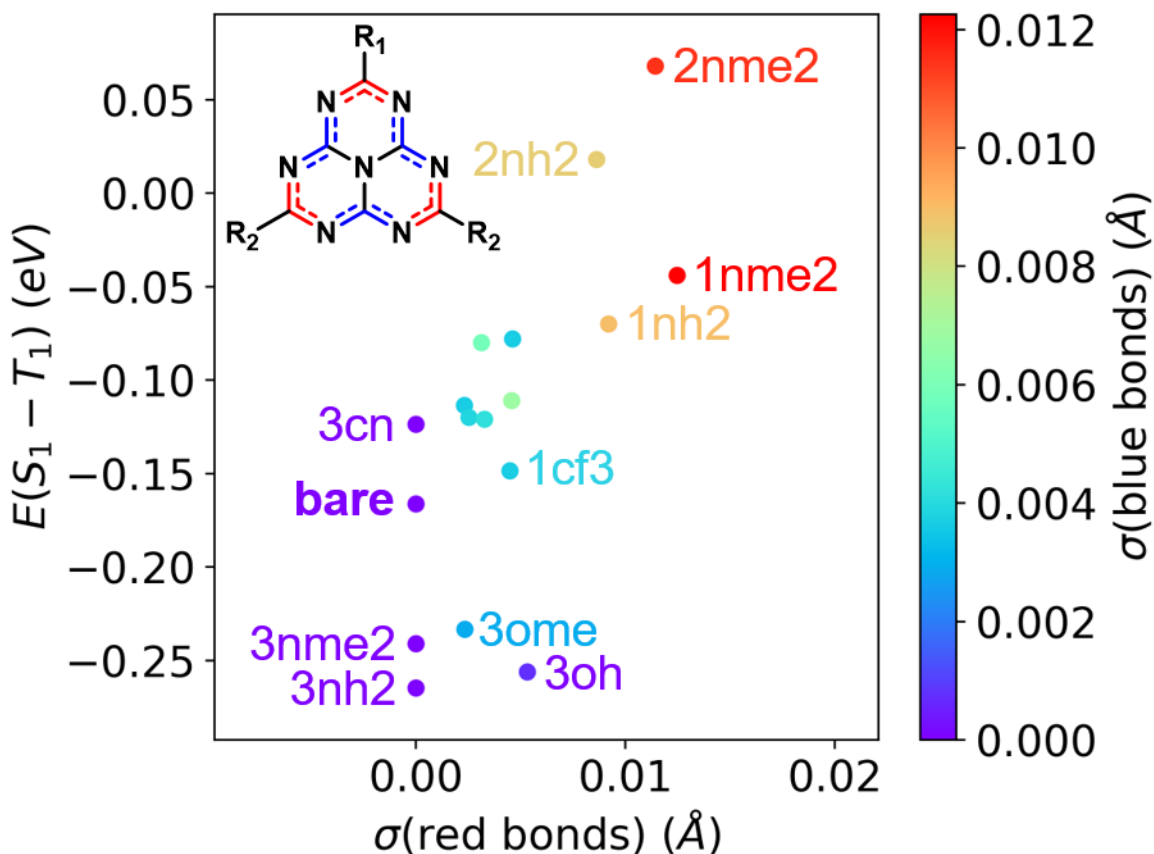

Figure S4: Comparison of excited-state singlet-triplet gap ( $E(S_1-T_1)$ , *y-axis*) and the standard deviation  $\sigma$  of bond lengths indicated in red and blue (*x-axis* and *color axis*, respectively) in heptazine derivatives. Labels correspond to the number and nature of R-group substituents, as indicated in the compound names provided in Table S1 *e.g.*, *3nh2* corresponds to heptazine functionalized with 3  $\text{NH}_2$  groups (*heptazine\_3nh2*). *3cn* and *1cf3* are listed as *heptazine\_3cn\_lumo* and *heptazine\_1cf3\_lumo* in Table S1. Threefold substitutions preserve the local symmetry and equivalent bond lengths of heptazine ( $\sigma = 0$ ), while one- and two-fold substitutions induce deformations in the overall symmetry of the molecular core, leading to variations in bond lengths and larger  $\sigma$ . No trend was identified with respect to the singlet-triplet gap and the absolute bond lengths (Figure S5). Energies computed at the EOM-CCSD/cc-pVDZ level (see Table S1 for values). Geometries obtained at the  $\omega\text{B97X-D/def2-TZVP}$  level.

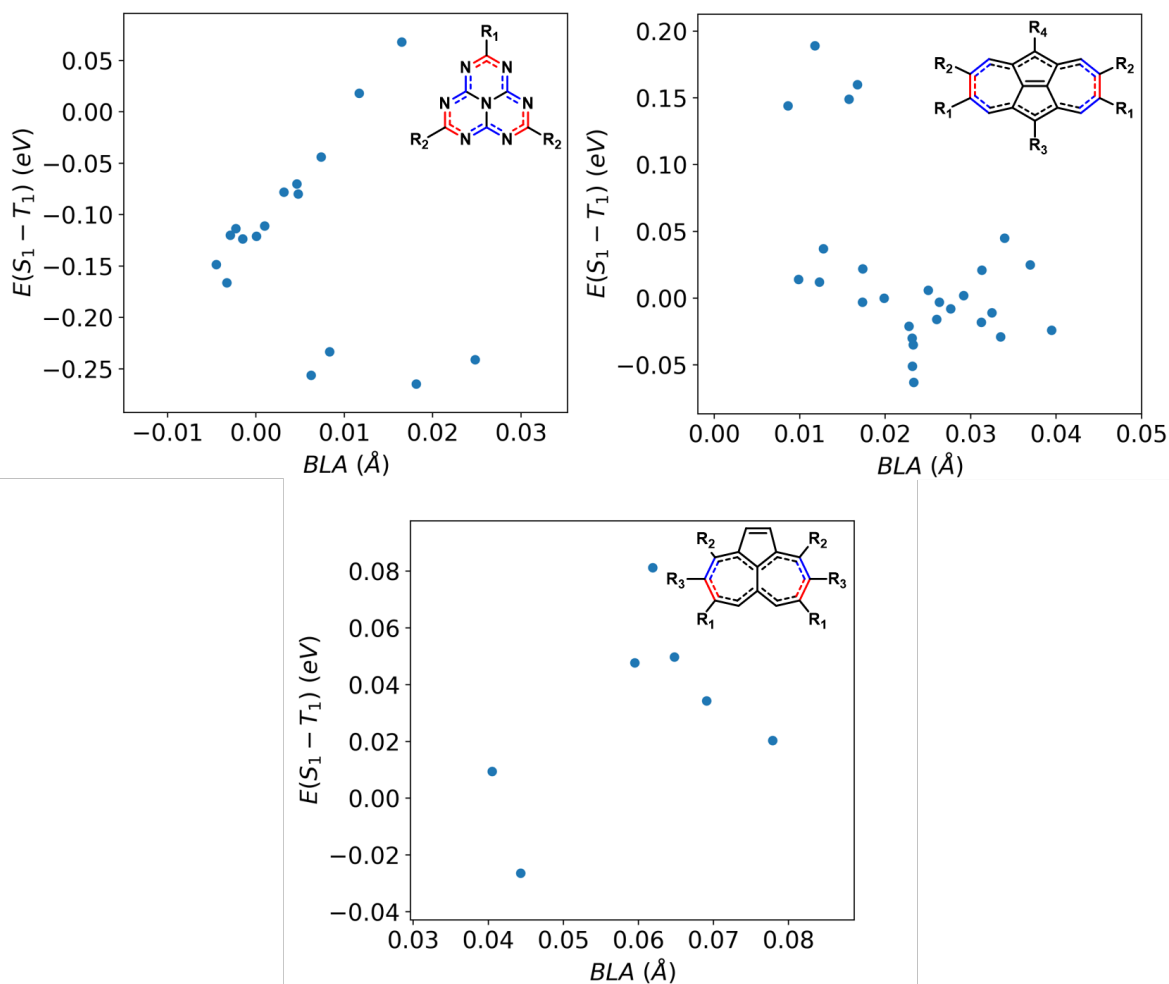

Figure S5: Comparison of the bond-length alternation between selected bonds (BLA, *x-axis*) and the excited-state singlet-triplet gap ( $E(S_1 - T_1)$ , *y-axis*) in three representative compounds, shown in insets. The BLA is defined as the difference between the length of the bonds marked in red and those marked in blue in the insets. In each unsubstituted parent compound, all red (and blue) bonds are of equal lengths. In some substituted derivatives, electronic and steric effects lead to small differences in bond lengths of each color. In these cases, the bond length taken for the calculation of the BLA was the average for all bonds of a given color. Energies computed at the EOM-CCSD/cc-pVDZ level (see Table S1 for values). Geometries obtained at the  $\omega$ B97X-D/def2-TZVP level.

Table S1: Singlet-triplet gaps computed using different methods;  $T_x$  is the triplet state with the same electron configuration as  $S_1$ . Energies are given in eV. The rightmost column indicates if the gap follows the expected trend based on the position of the substituents.

| Name                    | CC2                          |                          | EOM-CCSD                     |                              | cc-pVDZ                  |                          | Trend |
|-------------------------|------------------------------|--------------------------|------------------------------|------------------------------|--------------------------|--------------------------|-------|
|                         | aug-cc-pVDZ<br>$S_1-T_1$ gap | cc-pVDZ<br>$S_1-T_1$ gap | aug-cc-pVDZ<br>$S_1-T_1$ gap | aug-cc-pVDZ<br>$S_1-T_x$ gap | cc-pVDZ<br>$S_1-T_1$ gap | cc-pVDZ<br>$S_1-T_x$ gap |       |
| azulene                 | -0.005                       | -0.021                   | 0.073                        | 0.073                        | 0.055                    | 0.055                    |       |
| azulene_2nh2            | 0.387                        | 0.412                    | 0.595                        | -0.073                       | 0.628                    | -0.087                   | ✓     |
| azulene_2nh2_4me        | 0.134                        | 0.197                    |                              |                              | 0.465                    | -0.047                   | ✓     |
| azulene_2nh2_alt        | 0.002                        | -0.001                   | 0.152                        | 0.098                        | 0.144                    | 0.095                    | ×     |
| azulene_2oh_2me         | -0.010                       | -0.020                   |                              |                              | 0.047                    | 0.009                    | ✓     |
| azulene_2oh_2nh2        | 0.328                        | 0.374                    |                              |                              | 0.527                    | 0.019                    | ✓     |
| azulene_2oh_alt         | -0.028                       | -0.039                   | 0.100                        | 0.040                        | 0.088                    | 0.028                    | ✓     |
| azulene_2ome_2nh2       | 0.395                        | 0.423                    |                              |                              | 0.566                    | -0.052                   | ✓     |
| azulene_2ome_alt        | -0.026                       | -0.038                   | 0.050                        | 0.050                        | 0.035                    | 0.035                    | ✓     |
| azulene_4cf3            | -0.057                       | -0.064                   |                              |                              | 0.137                    | 0.013                    | ✓     |
| azulene_4f_homo         | 0.080                        | 0.091                    | 0.182                        | 0.182                        | 0.187                    | 0.187                    | ✓     |
| azulene_4f_lumo         | 0.133                        | 0.142                    |                              |                              | 0.408                    | -0.068                   | ✓     |
| azulene_4me_lumo        | -0.034                       | -0.042                   | 0.173                        | 0.048                        | 0.165                    | 0.040                    | ×     |
| azulene_4nh2            | 0.274                        | 0.316                    |                              |                              | 0.466                    | 0.071                    | ×     |
| azulene_4oh             | 0.274                        | 0.293                    | 0.483                        | -0.055                       | 0.496                    | -0.074                   | ✓     |
| azupyrene               | -0.047                       | -0.061                   | 0.042                        | 0.042                        | 0.026                    | 0.026                    |       |
| azupyrene_2cf3          | -0.056                       | -0.068                   |                              |                              | 0.016                    | 0.016                    | ✓     |
| azupyrene_2nh2          | -0.039                       | -0.044                   |                              |                              | 0.053                    | 0.053                    | ×     |
| azupyrene_2oh           | -0.072                       | -0.082                   |                              |                              | 0.007                    | 0.007                    | ✓     |
| azupyrene_2oh_1cf3      | -0.068                       | -0.076                   |                              |                              | 0.015                    | 0.015                    | ✓     |
| azupyrene_2ome          | -0.068                       | -0.081                   |                              |                              | 0.011                    | 0.011                    | ✓     |
| azupyrene_2ome_1cf3     | -0.062                       | -0.073                   |                              |                              | 0.017                    | 0.017                    | ✓     |
| azupyrene_4cn           | -0.077                       | -0.088                   |                              |                              | -0.002                   | -0.002                   | ✓     |
| azupyrene_4nh2          | 0.020                        | 0.030                    |                              |                              | 0.070                    | -0.127                   | ✓     |
| azupyrene_4oh           | 0.018                        | -0.015                   |                              |                              | -0.003                   | -0.120                   | ✓     |
| azupyrene_4oh_2cf3      | 0.017                        | 0.017                    |                              |                              | 0.041                    | -0.149                   | ✓     |
| azupyrene_4oh_4me       | 0.070                        | 0.053                    |                              |                              | 0.017                    | -0.116                   | ✓     |
| azupyrene_4oh_6f        | 0.139                        | 0.164                    |                              |                              | 0.156                    | -0.080                   | ✓     |
| azupyrene_4ome          | 1.769                        | -0.005                   |                              |                              | 0.013                    | -0.099                   | ✓     |
| cyclazine               | -0.124                       | -0.142                   | -0.071                       | -0.071                       | -0.093                   | -0.093                   | ×     |
| cyclazine_1cf3          | -0.120                       | -0.136                   |                              |                              | -0.081                   | -0.081                   | ×     |
| cyclazine_1cf3_lumo     | -0.058                       | -0.068                   | 0.026                        | 0.026                        |                          |                          | ✓     |
| cyclazine_1cn           | -0.086                       | -0.099                   |                              |                              | -0.030                   | -0.030                   | ×     |
| cyclazine_1cn_lumo      | -0.084                       | -0.096                   |                              |                              | -0.038                   | -0.038                   | ✓     |
| cyclazine_1nh2_homo     | 0.087                        | 0.094                    |                              |                              | 0.238                    | 0.238                    | ✓     |
| cyclazine_1nme2_homo    | 0.012                        | -0.019                   |                              |                              | 0.084                    | 0.084                    | ✓     |
| cyclazine_1oh_homo      | 0.111                        | 0.121                    |                              |                              | 0.273                    | 0.273                    | ✓     |
| cyclazine_1ome_homo     | 0.120                        | 0.128                    |                              |                              | 0.282                    | 0.282                    | ✓     |
| cyclazine_2cf3_side     | -0.131                       | -0.148                   |                              |                              | -0.095                   | -0.095                   | ✓     |
| cyclazine_2cf3_tip      | -0.119                       | -0.136                   |                              |                              | -0.080                   | -0.080                   | ×     |
| cyclazine_2cn_lumo      | -0.060                       | -0.068                   |                              |                              | 0.002                    | 0.002                    | ✓     |
| cyclazine_2cn_side      | -0.108                       | -0.123                   | -0.049                       | -0.049                       | -0.068                   | -0.068                   | ×     |
| cyclazine_2cn_tip       | -0.102                       | -0.118                   | -0.042                       | -0.042                       | -0.063                   | -0.063                   | ×     |
| cyclazine_2nh2          | -0.127                       | -0.141                   | -0.062                       | -0.062                       | -0.077                   | -0.077                   | ×     |
| cyclazine_2nh2_homo     | 0.008                        | 0.010                    |                              |                              | 0.133                    | 0.133                    | ✓     |
| cyclazine_2nh2_homo_alt | -0.004                       | -0.007                   |                              |                              | 0.107                    | 0.107                    | ✓     |
| cyclazine_2oh           | -0.137                       | -0.150                   | -0.079                       | -0.079                       | -0.094                   | -0.094                   | ✓     |
| cyclazine_2oh_2cf3      | -0.116                       | -0.127                   |                              |                              | -0.062                   | -0.062                   | ×     |
| cyclazine_2oh_homo      | 0.048                        | 0.059                    |                              |                              | 0.197                    | 0.197                    | ✓     |
| cyclazine_2oh_homo_alt  | 0.037                        | 0.044                    |                              |                              | 0.180                    | 0.180                    | ✓     |
| cyclazine_2ome          | -0.117                       | -0.136                   |                              |                              | -0.082                   | -0.082                   | ×     |
| cyclazine_2ome_homo     | 0.012                        | 0.014                    |                              |                              | 0.138                    | 0.138                    | ✓     |
| cyclazine_2ome_homo_alt | 0.011                        | 0.013                    |                              |                              | 0.141                    | 0.141                    | ✓     |
| cyclazine_3cn           |                              |                          |                              |                              | -0.005                   | -0.005                   | ×     |
| cyclazine_3cn_lumo      |                              |                          |                              |                              | 0.136                    | 0.136                    | ✓     |
| cyclazine_3nh2          | -0.204                       | -0.232                   |                              |                              | -0.181                   | -0.181                   | ✓     |
| cyclazine_3nme2         | -0.194                       | -0.216                   |                              |                              | -0.159                   | -0.159                   | ✓     |
| cyclazine_3oh           |                              |                          |                              |                              | -0.171                   | -0.171                   | ✓     |
| cyclazine_3ome          |                              |                          |                              |                              | -0.086                   | -0.086                   | ×     |
| heptazine               | -0.231                       | -0.253                   | -0.144                       | -0.144                       | -0.166                   | -0.166                   | ✓     |
| heptazine_1cf3_lumo     | -0.215                       | -0.236                   | -0.126                       | -0.126                       | -0.149                   | -0.149                   | ✓     |
| heptazine_1cn_lumo      | -0.188                       | -0.209                   |                              |                              | -0.120                   | -0.120                   | ✓     |
| heptazine_1nh2          | -0.168                       | -0.182                   |                              |                              | -0.070                   | -0.070                   | ×     |
| heptazine_1nme2         | -0.138                       | -0.162                   |                              |                              | -0.044                   | -0.044                   | ×     |
| heptazine_1oh           | -0.203                       | -0.221                   |                              |                              | -0.121                   | -0.121                   | ×     |
| heptazine_1ome          | -0.191                       | -0.212                   |                              |                              | -0.111                   | -0.111                   | ×     |
| heptazine_2cn_lumo      | -0.183                       | -0.201                   |                              |                              | -0.114                   | -0.114                   | ✓     |
| heptazine_2nh2          | -0.116                       | -0.127                   |                              |                              | 0.018                    | 0.018                    | ×     |
| heptazine_2nme2         | -0.061                       | -0.096                   |                              |                              | 0.068                    | 0.068                    | ×     |
| heptazine_2oh           | -0.179                       | -0.200                   |                              |                              | -0.078                   | -0.078                   | ×     |
| heptazine_2ome          | -0.187                       | -0.212                   |                              |                              | -0.080                   | -0.080                   | ×     |
| heptazine_3cn_lumo      | -0.192                       |                          |                              |                              | -0.124                   | -0.124                   | ✓     |
| heptazine_3nh2          |                              | -0.363                   | -0.231                       | -0.231                       | -0.265                   | -0.265                   | ✓     |
| heptazine_3nme2         | -0.327                       | -0.359                   |                              |                              | -0.241                   | -0.241                   | ✓     |
| heptazine_3oh           | -0.318                       | -0.351                   | -0.225                       | -0.225                       | -0.256                   | -0.256                   | ✓     |
| heptazine_3ome          | -0.286                       | -0.319                   |                              |                              | -0.233                   | -0.233                   | ✓     |

| Name                       | CC2                                               |                                               | EOM-CCSD                                          |                                                   | cc-pVDZ                                       |                                               | Trend |
|----------------------------|---------------------------------------------------|-----------------------------------------------|---------------------------------------------------|---------------------------------------------------|-----------------------------------------------|-----------------------------------------------|-------|
|                            | aug-cc-pVDZ<br>S <sub>1</sub> -T <sub>1</sub> gap | cc-pVDZ<br>S <sub>1</sub> -T <sub>1</sub> gap | aug-cc-pVDZ<br>S <sub>1</sub> -T <sub>1</sub> gap | aug-cc-pVDZ<br>S <sub>1</sub> -T <sub>x</sub> gap | cc-pVDZ<br>S <sub>1</sub> -T <sub>1</sub> gap | cc-pVDZ<br>S <sub>1</sub> -T <sub>x</sub> gap |       |
| isopyrene                  | -0.123                                            | -0.132                                        | -0.014                                            | -0.014                                            | -0.021                                        | -0.021                                        |       |
| isopyrene_1cf3             | -0.136                                            | -0.145                                        |                                                   |                                                   | -0.030                                        | -0.030                                        | ✓     |
| isopyrene_1cn_1            | -0.139                                            | -0.148                                        | -0.027                                            | -0.027                                            | -0.035                                        | -0.035                                        | ✓     |
| isopyrene_1cn_1_2nh2_3_9   | -0.104                                            | -0.120                                        |                                                   |                                                   | -0.011                                        | -0.011                                        | ×     |
| isopyrene_1cn_2            | -0.045                                            | -0.072                                        |                                                   |                                                   | 0.000                                         | -0.103                                        | n/a   |
| isopyrene_1cn_3            | -0.073                                            | -0.086                                        |                                                   |                                                   | 0.006                                         | 0.006                                         | ✓     |
| isopyrene_1cn_6_2NH2_2_10  | -0.099                                            | -0.108                                        |                                                   |                                                   | 0.014                                         | 0.014                                         | ×     |
| isopyrene_1cn_6_2nh2_3_9   | -0.029                                            | -0.048                                        |                                                   |                                                   | 0.045                                         | 0.045                                         | ×     |
| isopyrene_2cf3             | -0.167                                            | -0.175                                        |                                                   |                                                   | -0.051                                        | -0.051                                        | ✓     |
| isopyrene_2cf3_lumo        | -0.123                                            | -0.131                                        |                                                   |                                                   | -0.016                                        | -0.016                                        | ✓     |
| isopyrene_2cn_1_6          | -0.138                                            | -0.172                                        |                                                   |                                                   | -0.063                                        | -0.063                                        | ✓     |
| isopyrene_2cn_1_6_2nh2_3_9 | -0.036                                            | -0.048                                        |                                                   |                                                   | -0.011                                        | -0.011                                        | ×     |
| isopyrene_2cn_2_10         | -0.022                                            | -0.057                                        |                                                   |                                                   | -0.003                                        | -0.003                                        | n/a   |
| isopyrene_2cn_2_7          | 0.010                                             | -0.015                                        |                                                   |                                                   | 0.022                                         | 0.022                                         | n/a   |
| isopyrene_2cn_lumo         | -0.112                                            | -0.120                                        |                                                   |                                                   | -0.003                                        | -0.003                                        | ✓     |
| isopyrene_2nh2             | -0.100                                            | -0.107                                        |                                                   |                                                   | 0.021                                         | 0.021                                         | ×     |
| isopyrene_2nh2_2_10        | -0.068                                            | -0.080                                        |                                                   |                                                   | 0.037                                         | 0.037                                         | n/a   |
| isopyrene_2nh2_homo        | 0.038                                             | 0.042                                         |                                                   |                                                   | 0.189                                         | 0.189                                         | ✓     |
| isopyrene_2oh              | -0.117                                            | -0.125                                        |                                                   |                                                   | -0.008                                        | -0.008                                        | ×     |
| isopyrene_2oh_homo         | 0.012                                             | 0.015                                         |                                                   |                                                   | 0.149                                         | 0.149                                         | ✓     |
| isopyrene_2ome             | -0.125                                            | -0.134                                        |                                                   |                                                   | -0.018                                        | -0.018                                        | ×     |
| isopyrene_2ome_homo        | 0.018                                             | 0.018                                         |                                                   |                                                   | 0.160                                         | 0.160                                         | ✓     |
| isopyrene_4cn_2_5_7_10     | 0.121                                             | 0.090                                         |                                                   |                                                   | 0.012                                         | 0.012                                         | n/a   |
| isopyrene_4cn_3_4_8_9      | -0.112                                            | -0.118                                        |                                                   |                                                   | 0.002                                         | 0.002                                         | ✓     |
| isopyrene_4me              | -0.133                                            | -0.142                                        | -0.021                                            | -0.021                                            | -0.029                                        | -0.029                                        | ✓     |
| isopyrene_4nh2_2_5_7_10    | -0.038                                            | -0.007                                        |                                                   |                                                   | 0.144                                         | -0.060                                        | n/a   |
| isopyrene_4oh              | 0.013                                             | -0.140                                        |                                                   |                                                   | 0.025                                         | -0.062                                        | ✓     |
| isopyrene_4oh_2cn          | -0.086                                            | -0.168                                        |                                                   |                                                   | -0.024                                        | -0.024                                        | ✓     |
| mol8                       | -0.023                                            | -0.026                                        | 0.093                                             | 0.093                                             | 0.091                                         | 0.091                                         | ✓     |
| mol8_2cf3                  | -0.046                                            | -0.047                                        |                                                   |                                                   | 0.082                                         | 0.082                                         | ✓     |
| mol8_2cn                   | -0.051                                            | -0.055                                        | 0.067                                             | 0.067                                             | 0.062                                         | 0.062                                         | ✓     |
| mol8_2nh2                  | -0.068                                            | -0.076                                        |                                                   |                                                   | 0.048                                         | 0.048                                         | ✓     |
| mol8_2oh                   | -0.071                                            | -0.082                                        | 0.039                                             | 0.039                                             | 0.029                                         | 0.029                                         | ✓     |
| mol8_2ome                  | -0.083                                            | -0.093                                        | 0.025                                             | 0.025                                             | 0.015                                         | 0.015                                         | ✓     |
| mol8_4oh                   | -0.108                                            | -0.121                                        | 0.056                                             | 0.056                                             | 0.052                                         | 0.052                                         | ✓     |
| mol8_4ome                  | -0.088                                            | -0.103                                        |                                                   |                                                   | 0.039                                         | 0.039                                         | ✓     |
| mol15                      | -0.012                                            | -0.017                                        | 0.089                                             | 0.089                                             | 0.081                                         | 0.081                                         | ✓     |
| mol15_2cn                  | -0.040                                            | -0.046                                        |                                                   |                                                   | 0.048                                         | 0.048                                         | ✓     |
| mol15_2nh2                 | -0.079                                            | -0.086                                        |                                                   |                                                   | 0.020                                         | 0.020                                         | ✓     |
| mol15_2oh                  | -0.063                                            | -0.067                                        |                                                   |                                                   | 0.034                                         | 0.034                                         | ✓     |
| mol15_2ome                 | -0.044                                            | -0.052                                        |                                                   |                                                   | 0.050                                         | 0.050                                         | ✓     |
| mol15_4nh2                 | -0.071                                            | -0.085                                        |                                                   |                                                   | 0.009                                         | 0.009                                         | ✓     |
| mol15_4oh                  | -0.106                                            | -0.115                                        | -0.015                                            | -0.015                                            | -0.026                                        | -0.026                                        | ✓     |
| mol62                      | 0.077                                             | 0.083                                         |                                                   |                                                   | 0.205                                         | 0.205                                         | ✓     |
| mol62_2cf3                 | -0.105                                            | -0.112                                        |                                                   |                                                   | 0.024                                         | 0.024                                         | ✓     |
| mol62_4nh2                 | -0.107                                            | -0.110                                        |                                                   |                                                   | 0.067                                         | 0.067                                         | ✓     |
| mol62_4oh                  | -0.124                                            | -0.128                                        |                                                   |                                                   | -0.002                                        | -0.002                                        | ✓     |
| mol76                      | 0.057                                             | 0.057                                         |                                                   |                                                   | 0.186                                         | 0.186                                         | ✓     |
| mol76_4nh2                 | 0.099                                             | 0.081                                         |                                                   |                                                   | 0.295                                         | 0.295                                         | ×     |
| mol77                      | 0.019                                             | 0.045                                         |                                                   |                                                   | 0.418                                         | 0.107                                         | ✓     |
| mol77_2oh                  | 0.187                                             | 0.201                                         |                                                   |                                                   | 0.432                                         | 0.432                                         | ×     |
| mol86                      | 0.065                                             | 0.064                                         |                                                   |                                                   |                                               |                                               | ✓     |
| mol86_3nh2                 | 0.081                                             | 0.093                                         |                                                   |                                                   | 0.288                                         | 0.288                                         | ✓     |
| mol86_3oh                  | 0.044                                             | 0.044                                         |                                                   |                                                   | 0.165                                         | 0.165                                         | ✓     |
| mol98                      | -0.010                                            | -0.016                                        |                                                   |                                                   | 0.245                                         | 0.068                                         | ✓     |
| mol98_3oh                  | 0.358                                             | 0.397                                         |                                                   |                                                   | 0.683                                         | 0.028                                         | ✓     |
| mol136                     | 0.004                                             | -0.003                                        |                                                   |                                                   | 0.135                                         | 0.135                                         | ✓     |
| mol136_2nh2                | 0.414                                             | 0.436                                         |                                                   |                                                   | 0.644                                         | 0.644                                         | ×     |
| mol136_2oh                 | 0.255                                             | 0.279                                         |                                                   |                                                   | 0.543                                         | 0.543                                         | ×     |
| mol143                     | 0.000                                             | -0.011                                        |                                                   |                                                   | 0.120                                         | 0.073                                         | ✓     |
| mol143_2oh                 | 0.272                                             | 0.291                                         |                                                   |                                                   | 0.538                                         | 0.029                                         | ✓     |
| mol151                     | -0.009                                            | -0.013                                        |                                                   |                                                   | 0.066                                         | 0.066                                         | ✓     |
| mol151_2cf3                | -0.013                                            | -0.017                                        |                                                   |                                                   | 0.065                                         | 0.065                                         | ✓     |
| mol151_3nh2                | -0.083                                            | -0.087                                        |                                                   |                                                   | -0.009                                        | -0.009                                        | ✓     |
| mol151_3oh                 | -0.085                                            | -0.090                                        |                                                   |                                                   | -0.016                                        | -0.016                                        | ✓     |



| Name                        | CC2                                               |                                               | EOM-CCSD                                          |                                                   | cc-pVDZ                                       |                                               | Trend |
|-----------------------------|---------------------------------------------------|-----------------------------------------------|---------------------------------------------------|---------------------------------------------------|-----------------------------------------------|-----------------------------------------------|-------|
|                             | aug-cc-pVDZ<br>S <sub>1</sub> -T <sub>1</sub> gap | cc-pVDZ<br>S <sub>1</sub> -T <sub>1</sub> gap | aug-cc-pVDZ<br>S <sub>1</sub> -T <sub>1</sub> gap | aug-cc-pVDZ<br>S <sub>1</sub> -T <sub>x</sub> gap | cc-pVDZ<br>S <sub>1</sub> -T <sub>1</sub> gap | cc-pVDZ<br>S <sub>1</sub> -T <sub>x</sub> gap |       |
| pentaazaphenalene           | -0.127                                            | -0.151                                        | -0.038                                            | -0.038                                            | -0.067                                        | -0.067                                        |       |
| pentaazaphenalene_1cf3      | -0.146                                            | -0.169                                        | -0.058                                            | -0.058                                            | -0.087                                        | -0.087                                        | ✓     |
| pentaazaphenalene_1cf3_lumo | -0.099                                            | -0.120                                        |                                                   |                                                   | -0.029                                        | -0.029                                        | ✓     |
| pentaazaphenalene_1cn       | -0.136                                            | -0.159                                        | -0.047                                            | -0.047                                            | -0.077                                        | -0.077                                        | ✓     |
| pentaazaphenalene_1cn_lumo  | -0.064                                            | -0.084                                        |                                                   |                                                   | 0.009                                         | 0.009                                         | ✓     |
| pentaazaphenalene_1nh2      | -0.152                                            | -0.171                                        |                                                   |                                                   | -0.086                                        | -0.086                                        | ✓     |
| pentaazaphenalene_1nme2     | -0.140                                            | -0.165                                        | -0.051                                            | -0.051                                            | -0.077                                        | -0.077                                        | ✓     |
| pentaazaphenalene_1oh       | -0.167                                            | -0.190                                        | -0.087                                            | -0.087                                            | -0.111                                        | -0.111                                        | ✓     |
| pentaazaphenalene_1ome      | -0.157                                            | -0.181                                        |                                                   |                                                   | -0.100                                        | -0.100                                        | ✓     |
| pentaazaphenalene_2cf3      |                                                   | -0.186                                        |                                                   |                                                   | -0.107                                        | -0.107                                        | ✓     |
| pentaazaphenalene_2cf3_lumo | -0.112                                            | -0.129                                        |                                                   |                                                   | -0.043                                        | -0.043                                        | ✓     |
| pentaazaphenalene_2cn       | -0.141                                            | -0.164                                        | -0.053                                            | -0.053                                            | -0.083                                        | -0.083                                        | ✓     |
| pentaazaphenalene_2cn_lumo  | -0.094                                            | -0.111                                        |                                                   |                                                   | -0.027                                        | -0.027                                        | ✓     |
| pentaazaphenalene_2nh2      | 0.074                                             | 0.066                                         |                                                   |                                                   | 0.216                                         | 0.216                                         | ×     |
| pentaazaphenalene_2nh2_homo | 0.082                                             |                                               |                                                   |                                                   | 0.209                                         | 0.209                                         | ✓     |
| pentaazaphenalene_2nme2     | 0.125                                             | 0.090                                         |                                                   |                                                   | 0.251                                         | 0.251                                         | ×     |
| pentaazaphenalene_2oh       |                                                   | 0.002                                         | 0.165                                             | 0.165                                             | 0.135                                         | 0.135                                         | ×     |
| pentaazaphenalene_2ome      | 0.023                                             | -0.026                                        |                                                   |                                                   | 0.114                                         | 0.114                                         | ×     |
| pentaazaphenalene_2oh_homo  |                                                   | 0.013                                         |                                                   |                                                   | 0.135                                         | 0.135                                         | ✓     |
| pentaazaphenalene_2ome_homo | -0.052                                            | -0.075                                        |                                                   |                                                   | 0.023                                         | 0.023                                         | ✓     |
| pentaazaphenalene_3cn_lumo  | -0.092                                            | -0.107                                        |                                                   |                                                   | -0.020                                        | -0.020                                        | ✓     |
| pentaazaphenalene_3nh2      | -0.156                                            | -0.183                                        |                                                   |                                                   | -0.057                                        | -0.057                                        | ×     |
| pentaazaphenalene_3nme2     | -0.115                                            | -0.150                                        |                                                   |                                                   | -0.008                                        | -0.008                                        | ×     |
| pentaazaphenalene_3oh       | -0.170                                            | -0.196                                        | -0.053                                            | -0.053                                            | -0.085                                        | -0.085                                        | ✓     |
| pentaazaphenalene_3ome      | -0.153                                            | -0.177                                        |                                                   |                                                   | -0.060                                        | -0.060                                        | ×     |

Table S2: Oscillator strengths and excitation energies for select molecules computed using Tamm-Dancoff approximated time-dependent density functional theory at the  $\omega$ B97X-D/def2-TZVP level. Energies are given in eV.

| Name                    | $E(S_1)$ | $E(T_1)$ | $f(S_1)$ |
|-------------------------|----------|----------|----------|
| azulene_2nh2            | 3.039    | 2.266    | 0.0002   |
| azulene_2nh2_alt        | 3.174    | 2.667    | 0.0194   |
| azulene_2nh2_4me        | 2.776    | 2.259    | 0.0007   |
| azulene_2oh_2me         | 2.696    | 2.246    | 0.0124   |
| azulene_2oh_2nh2        | 3.294    | 2.601    | 0.0038   |
| azulene_2oh_alt         | 2.922    | 2.480    | 0.0122   |
| azulene_2ome_2nh2       | 3.235    | 2.484    | 0.0014   |
| azulene_2ome_alt        | 2.831    | 2.406    | 0.0132   |
| azulene_4cf3            | 2.713    | 2.293    | 0.0099   |
| azulene_4f_homo         | 1.938    | 1.289    | 0.0225   |
| azulene_4f_lumo         | 3.150    | 2.677    | 0.0039   |
| azulene_4me_lumo        | 2.748    | 2.328    | 0.0151   |
| azulene_4nh2            | 3.423    | 2.788    | 0.0034   |
| azulene_4oh             | 3.418    | 2.787    | 0.0002   |
| azupyrene_2cf3          | 2.236    | 1.985    | 0.0000   |
| azupyrene_2nh2          | 2.563    | 2.201    | 0.0099   |
| azupyrene_2oh           | 2.464    | 2.181    | 0.0036   |
| azupyrene_2oh_cf3       | 2.513    | 2.231    | 0.0038   |
| azupyrene_2ome          | 2.435    | 2.150    | 0.0036   |
| azupyrene_2ome_cf3      | 2.491    | 2.205    | 0.0040   |
| azupyrene_4cn           | 2.157    | 1.907    | 0.0000   |
| azupyrene_4nh2          | 3.077    | 2.713    | 0.0000   |
| azupyrene_4oh           | 2.821    | 2.530    | 0.0000   |
| azupyrene_4oh_2cf3      | 3.099    | 2.755    | 0.0000   |
| azupyrene_4oh_4me       | 2.696    | 2.380    | 0.0000   |
| azupyrene_4oh_6f        | 2.641    | 2.224    | 0.0000   |
| azupyrene_4ome          | 2.748    | 2.457    | 0.0000   |
| cyclazine               | 1.367    | 1.160    | 0.0000   |
| cyclazine_1cf3          | 1.494    | 1.281    | 0.0001   |
| cyclazine_1cf3_lumo     | 1.365    | 1.101    | 0.0003   |
| cyclazine_1cn           | 1.551    | 1.318    | 0.0004   |
| cyclazine_1cn_lumo      | 1.218    | 0.963    | 0.0011   |
| cyclazine_1nh2_homo     | 1.526    | 1.156    | 0.0011   |
| cyclazine_1nme2_homo    | 1.464    | 1.174    | 0.0003   |
| cyclazine_1oh_homo      | 1.534    | 1.144    | 0.0010   |
| cyclazine_1ome_homo     | 1.594    | 1.197    | 0.0006   |
| cyclazine_2cf3_side     | 1.577    | 1.369    | 0.0003   |
| cyclazine_2cf3_tip      | 1.620    | 1.403    | 0.0001   |
| cyclazine_2cn_lumo      | 1.123    | 0.852    | 0.0007   |
| cyclazine_2cn_side      | 1.584    | 1.352    | 0.0055   |
| cyclazine_2cn_tip       | 1.641    | 1.415    | 0.0007   |
| cyclazine_2nh2          | 1.965    | 1.731    | 0.0040   |
| cyclazine_2nh2_homo     | 1.219    | 0.917    | 0.0001   |
| cyclazine_2nh2_homo_alt | 1.215    | 0.909    | 0.0015   |
| cyclazine_2oh           | 1.864    | 1.648    | 0.0021   |
| cyclazine_2oh_2cf3      | 2.123    | 1.895    | 0.0016   |
| cyclazine_2oh_homo      | 1.320    | 0.980    | 0.0007   |
| cyclazine_2oh_homo_alt  | 1.300    | 0.962    | 0.0006   |
| cyclazine_2ome          | 1.819    | 1.601    | 0.0024   |
| cyclazine_2ome_homo     | 1.206    | 0.898    | 0.0001   |
| cyclazine_2ome_homo_alt | 1.229    | 0.905    | 0.0018   |
| cyclazine_3cn           | 1.732    | 1.502    | 0.0000   |
| cyclazine_3cn_lumo      | 1.133    | 0.813    | 0.0000   |
| cyclazine_3nh2          | 2.239    | 2.100    | 0.0000   |
| cyclazine_3nme2         | 2.278    | 2.145    | 0.0000   |
| cyclazine_3oh           | 2.117    | 1.965    | 0.0000   |
| cyclazine_3ome          | 2.150    | 1.955    | 0.0000   |
| heptazine               | 3.220    | 2.982    | 0.0000   |
| heptazine_1cf3_lumo     | 3.189    | 2.937    | 0.0002   |
| heptazine_1cn_lumo      | 3.108    | 2.826    | 0.0015   |
| heptazine_1nh2          | 3.600    | 3.261    | 0.0113   |
| heptazine_1nme2         | 3.655    | 3.285    | 0.0140   |
| heptazine_1oh           | 3.515    | 3.225    | 0.0063   |
| heptazine_1ome          | 3.513    | 3.217    | 0.0061   |
| heptazine_2cn_lumo      | 3.022    | 2.743    | 0.0011   |
| heptazine_2nh2          | 3.957    | 3.534    | 0.0169   |
| heptazine_2nme2         | 4.032    | 3.552    | 0.0267   |
| heptazine_2oh           | 3.811    | 3.473    | 0.0117   |
| heptazine_2ome          | 3.797    | 3.464    | 0.0132   |
| heptazine_3cn_lumo      | 2.955    | 2.692    | 0.0000   |
| heptazine_3nh2          | 4.327    | 4.183    | 0.0000   |
| heptazine_3nme2         | 4.411    | 4.242    | 0.0000   |
| heptazine_3oh           | 4.131    | 3.971    | 0.0003   |
| heptazine_3ome          | 4.091    | 3.930    | 0.0007   |

| Name                        | E(S <sub>1</sub> ) | E(T <sub>1</sub> ) | f(S <sub>1</sub> ) |
|-----------------------------|--------------------|--------------------|--------------------|
| isopyrene_1cf3              | 2.284              | 2.083              | 0.0022             |
| isopyrene_1cn_1             | 2.276              | 2.085              | 0.0015             |
| isopyrene_1cn_1_2nh2_3_9    | 2.446              | 2.242              | 0.0014             |
| isopyrene_1cn_2             | 2.166              | 1.940              | 0.0002             |
| isopyrene_1cn_3             | 2.114              | 1.889              | 0.0001             |
| isopyrene_1cn_6_2nh2_2_10   | 2.290              | 2.021              | 0.0143             |
| isopyrene_1cn_6_2nh2_3_9    | 2.408              | 2.088              | 0.0181             |
| isopyrene_2cf3              | 2.371              | 2.205              | 0.0000             |
| isopyrene_2cf3_lumo         | 2.037              | 1.833              | 0.0000             |
| isopyrene_2cn_1_6           | 2.338              | 2.184              | 0.0000             |
| isopyrene_2cn_2_10          | 2.124              | 1.909              | 0.0000             |
| isopyrene_2cn_2_7           | 2.109              | 1.848              | 0.0000             |
| isopyrene_2cn_lumo          | 2.038              | 1.828              | 0.0003             |
| isopyrene_2nh2              | 2.314              | 2.050              | 0.0064             |
| isopyrene_2nh2_2_10         | 2.156              | 1.841              | 0.0215             |
| isopyrene_2nh2_homo         | 1.611              | 1.289              | 0.0000             |
| isopyrene_2oh               | 2.267              | 2.039              | 0.0015             |
| isopyrene_2oh_homo          | 1.714              | 1.408              | 0.0001             |
| isopyrene_2ome              | 2.174              | 1.954              | 0.0018             |
| isopyrene_2ome_homo         | 1.740              | 1.435              | 0.0003             |
| isopyrene_4cn_2_5_7_10      | 2.072              | 1.844              | 0.0000             |
| isopyrene_4cn_3_4_8_9       | 1.878              | 1.672              | 0.0000             |
| isopyrene_4me               | 2.168              | 1.973              | 0.0000             |
| isopyrene_4oh               | 2.354              | 2.146              | 0.0007             |
| isopyrene_4oh_2cn           | 2.521              | 2.361              | 0.0010             |
| isopyrene_4nh2_2_5_7_10     | 2.202              | 1.725              | 0.0000             |
| mol136_2nh2                 | 2.860              | 2.073              | 0.0026             |
| mol136_2oh                  | 2.891              | 2.264              | 0.0027             |
| mol143_2oh                  | 2.782              | 2.111              | 0.0033             |
| mol15_2cn                   | 1.755              | 1.485              | 0.0001             |
| mol15_2nh2                  | 2.122              | 1.866              | 0.0003             |
| mol15_2oh                   | 2.000              | 1.731              | 0.0002             |
| mol15_2ome                  | 1.868              | 1.588              | 0.0004             |
| mol15_4nh2                  | 2.610              | 2.288              | 0.0291             |
| mol15_4oh                   | 2.392              | 2.127              | 0.0079             |
| mol151_2cf3                 | 1.292              | 0.983              | 0.0038             |
| mol151_3nh2                 | 1.768              | 1.532              | 0.0066             |
| mol151_3oh                  | 1.647              | 1.408              | 0.0037             |
| mol62_2cf3                  | 1.534              | 1.279              | 0.0024             |
| mol62_4nh2                  | 1.873              | 1.533              | 0.0035             |
| mol62_4oh                   | 1.760              | 1.471              | 0.0021             |
| mol76_4nh2                  | 2.418              | 1.971              | 0.0578             |
| mol77_2oh                   | 2.696              | 2.085              | 0.0068             |
| mol8_2cf3                   | 2.145              | 1.861              | 0.0046             |
| mol8_2cn                    | 2.059              | 1.773              | 0.0112             |
| mol8_2nh2                   | 2.303              | 1.996              | 0.0041             |
| mol8_2oh                    | 2.180              | 1.892              | 0.0015             |
| mol8_2ome                   | 2.070              | 1.783              | 0.0033             |
| mol8_4oh                    | 2.424              | 2.151              | 0.0010             |
| mol8_4ome                   | 2.258              | 1.968              | 0.0029             |
| mol86_3nh2                  | 2.589              | 2.136              | 0.0077             |
| mol86_3oh                   | 2.473              | 2.123              | 0.0061             |
| mol98_3oh                   | 2.357              | 1.505              | 0.0079             |
| pentaazaphenalene           | 2.624              | 2.301              | 0.0054             |
| pentaazaphenalene_1cf3      | 2.671              | 2.366              | 0.0056             |
| pentaazaphenalene_1cf3_lumo | 2.561              | 2.188              | 0.0088             |
| pentaazaphenalene_1cn       | 2.636              | 2.324              | 0.0096             |
| pentaazaphenalene_1cn_lumo  | 2.483              | 2.053              | 0.0130             |
| pentaazaphenalene_1nh2      | 2.956              | 2.694              | 0.0000             |
| pentaazaphenalene_1nme2     | 2.963              | 2.698              | 0.0001             |
| pentaazaphenalene_1oh       | 2.858              | 2.607              | 0.0004             |
| pentaazaphenalene_1ome      | 2.856              | 2.600              | 0.0004             |
| pentaazaphenalene_2cf3      | 2.721              | 2.437              | 0.0056             |
| pentaazaphenalene_2cf3_lumo | 2.580              | 2.254              | 0.0046             |
| pentaazaphenalene_2cn       | 2.635              | 2.331              | 0.0144             |
| pentaazaphenalene_2cn_lumo  | 2.406              | 2.093              | 0.0037             |
| pentaazaphenalene_2nh2      | 3.300              | 2.629              | 0.0605             |
| pentaazaphenalene_2nh2_homo | 2.165              | 1.609              | 0.0167             |
| pentaazaphenalene_2nme2     | 3.349              | 2.637              | 0.0930             |
| pentaazaphenalene_2oh       | 3.198              | 2.610              | 0.0397             |
| pentaazaphenalene_2oh_homo  | 2.281              | 1.788              | 0.0103             |
| pentaazaphenalene_2ome      | 3.142              | 2.582              | 0.0405             |
| pentaazaphenalene_2ome_homo | 2.421              | 2.019              | 0.0105             |
| pentaazaphenalene_3cn_lumo  | 2.323              | 1.976              | 0.0086             |
| pentaazaphenalene_3nh2      | 3.613              | 3.244              | 0.0266             |
| pentaazaphenalene_3nme2     | 3.655              | 3.251              | 0.0426             |
| pentaazaphenalene_3oh       | 3.446              | 3.102              | 0.0156             |
| pentaazaphenalene_3ome      | 3.425              | 3.079              | 0.0176             |

## References

- (1) TURBOMOLE V7.4 2019, a development of University of Karlsruhe and Forschungszentrum Karlsruhe GmbH, 1989-2007, TURBOMOLE GmbH, since 2007; available from <http://www.turbomole.com>.
- (2) Blaskovits, J. T.; Garner, M. H.; Corminboeuf, C. Symmetry-Induced Singlet-Triplet Inversions in Non-Alternant Hydrocarbons\*\*. *Angew. Chem. Int. Ed.* **2023**, *62*, e202218156.
- (3) Garner, M. H.; Blaskovits, J. T.; Corminboeuf, C. Double-bond delocalization in non-alternant hydrocarbons induces inverted singlet–triplet gaps. *Chem. Sci.* **2023**, *14*, 10458–10466.
- (4) Vosskötter, S.; Konieczny, P.; Marian, C. M.; Weinkauff, R. Towards an understanding of the singlet–triplet splittings in conjugated hydrocarbons: azulene investigated by anion photoelectron spectroscopy and theoretical calculations. *Phys. Chem. Chem. Phys.* **2015**, *17*, 23573–23581.
- (5) Tsuchiya, T.; Hamano, T.; Inoue, M.; Nakamura, T.; Wakamiya, A.; Mazaki, Y. Intense absorption of azulene realized by molecular orbital inversion. *Chem. Commun.* **2023**, *59*, 10604–10607.
